# Supplementary material for: Evolution of a transposon in Daphnia hybrid genomes
Source: PubMed Central journal article supplement (PMC3575242; doi:10.1186/1759-8753-4-7), 2013-02-06
Supplement: 1759-8753-4-7-S1.pdf [file 1759-8753-4-7-S1.pdf]

**Additional File 1. Description of *Daphnia* isolates included in this study.**

The labels of the isolates are composites of their characteristics. The first two letters represent the mitochondrial haplotypes (AR = *D. arenata*, EPC = European *D. pulicaria*, EPX = European *D. pulex*, MI = *D. middendorffiana*, PC = *D. pulicaria*, PX = *D. pulex*, TE= *D. tenebrosa*) followed by the ploidy level (2 or 3), a 2 letter country or state/province code and the isolate number. Sequences marked with an asterisk (\*) were obtained from a RT-PCR product. Accession numbers refer to *Pokey* sequences amplified from *Daphnia* isolates.

| Isolates  | mitochondrial haplotype        | Ploidy level | <i>Ldh</i> genotype | Accession number       | Geographic location  |
|-----------|--------------------------------|--------------|---------------------|------------------------|----------------------|
| PX2-MB-1  | North-American <i>D. pulex</i> | 2x           | SS                  | /                      | Churchill, MB, CAN   |
| PX2-MB-2  | North-American <i>D. pulex</i> | 2x           | SS                  | /                      | Churchill, MB, CAN   |
| PX2-ON-3  | North-American <i>D. pulex</i> | 2x           | SS                  | /                      | Windsor, ON, CAN     |
| PX2-ON-4  | North-American <i>D. pulex</i> | 2x           | SS                  | /                      | Windsor, ON, CAN     |
| PX2-ON-9  | North-American <i>D. pulex</i> | 2X           | SS                  | [JX848694]             | Windsor, ON, CAN     |
| PX2-MB-3  | North-American <i>D. pulex</i> | 2x           | SF                  | [JX838828]             | Churchill, MB, CAN   |
| PX2-ON-2  | North-American <i>D. pulex</i> | 2x           | SF                  | /                      | Windsor, ON, CAN     |
| PX2-ON-10 | North-American <i>D. pulex</i> | 2x           | SF                  | /                      | Windsor, ON, CAN     |
| PX2-QC-5  | North-American <i>D. pulex</i> | 2x           | SF                  | /                      | Ste-Foy, QC, CAN     |
| PX2-QC-6  | North-American <i>D. pulex</i> | 2x           | SF                  | /                      | Ste-Foy, QC, CAN     |
| PX2-MI-11 | North-American <i>D. pulex</i> | 2x           | SF                  | /                      | MI, USA              |
| PX2-QC-8  | North-American <i>D. pulex</i> | 2x           | SF                  | [JX838839 to JX838845] | Kuujjarapik, QC, CAN |
| PX2-QC-9  | North-American <i>D. pulex</i> | 2x           | SF                  | /                      | Métis, QC, CAN       |
| PX2-QC-12 | North-American <i>D. pulex</i> | 2x           | SF                  | /                      | Métis, QC, CAN       |
| PX3-QC-1  | North-American <i>D. pulex</i> | 3x           | SF                  | [JX838848 to JX838850] | Kuujjarapik, QC, CAN |
| PX3-QC-2  | North-American <i>D. pulex</i> | 3x           | SF                  | /                      | Kuujjarapik, QC, CAN |

|          |                                |    |    |                        |                            |
|----------|--------------------------------|----|----|------------------------|----------------------------|
| PC3-QC-1 | Eastern <i>D. pulicaria</i>    | 3x | SF | [JX838851]             | Kuujarapik, QC, CAN        |
| PC3-QC-2 | Eastern <i>D. pulicaria</i>    | 3x | SF | /                      | Kuujarapik, QC, CAN        |
| PC3-QC-3 | Eastern <i>D. pulicaria</i>    | 3x | SF | [JX838846, JX838847]   | Kuujarapik, QC, CAN        |
| PX2-IL-1 | North-American <i>D. pulex</i> | 2x | FF | /                      | Vermillion County, IL, USA |
| PX2-IL-2 | North-American <i>D. pulex</i> | 2x | FF | /                      | Vermillion County, IL, USA |
| PX2-IL-3 | North-American <i>D. pulex</i> | 2x | FF | /                      | Vermillion County, IL, USA |
| PX2-IL-4 | North-American <i>D. pulex</i> | 2x | FF | /                      | Vermillion County, IL, USA |
| PC3-MB-4 | Polar <i>D. pulicaria</i>      | 3x | SF | /                      | Churchill, MB, CAN         |
| PC3-MB-5 | Polar <i>D. pulicaria</i>      | 3x | SF | [JX838811, JX838812]   | Churchill, MB, CAN         |
| PC2-IN-1 | Western <i>D. pulicaria</i>    | 2x | FF | /                      | IN, USA                    |
| PC2-IN-2 | Western <i>D. pulicaria</i>    | 2x | FF | /                      | IN, USA                    |
| PC2-MB-3 | Western <i>D. pulicaria</i>    | 2x | FF | /                      | Winnipeg, MB, CAN          |
| PC2-QC-4 | Western <i>D. pulicaria</i>    | 2x | FF | [JX838808 to JX838810] | Kuujarapik, QC, CAN        |
| PC3-MB-6 | Western <i>D. pulicaria</i>    | 3x | SF | /                      | Churchill, MB, CAN         |
| PC3-MB-7 | Western <i>D. pulicaria</i>    | 3x | SF | /                      | Kuujarapik, QC, CAN        |
| MI3-MB-1 | <i>D. Middendorffiana s.s.</i> | 3x | SF | /                      | Churchill, MB, CAN         |
| MI3-MB-2 | <i>D. Middendorffiana s.s.</i> | 3x | SF | [JX838813]             | Churchill, MB, CAN         |
| TE2-MB-1 | <i>D. tenebrosa</i>            | 2x | UN | [JX838832, JX838833]   | Churchill, MB, CAN         |

|           |                                |       |    |                          |                            |
|-----------|--------------------------------|-------|----|--------------------------|----------------------------|
| TE2-MB-2  | <i>D. tenebrosa</i>            | 2x    | UN | [JX838836]               | Churchill, MB, CAN         |
| TE2-MB-3  | <i>D. tenebrosa</i>            | 2x    | UN | [JX838837, JX838838]     | Churchill, MB, CAN         |
| TE3-MB-1  | <i>D. tenebrosa</i>            | 3x    | UN | [JX838819 to JX838822]   | Churchill, MB, CAN         |
| TE3-MB-2  | <i>D. tenebrosa</i>            | 3x    | UN | [JX838823 to JX838827]   | Churchill, MB, CAN         |
| TE3-MB-3  | <i>D. tenebrosa</i>            | 3x/4x | UN | [JX838829 to JX838831]   | Churchill, MB, CAN         |
| TE3-MB-4  | <i>D. tenebrosa</i>            | 3x    | SS | [JX838814 to JX838818]   | Churchill, MB, CAN         |
| EPC2-CZ-1 | European <i>D. pulicaria</i>   | 2x    | UN | [JX838834]               | Lowland, CZE               |
| EPC2-SP-2 | European <i>D. pulicaria</i>   | 2x    | UN | [JX838835]               | Catalonia, ESP             |
| EPC2-DE-3 | European <i>D. pulicaria</i>   | 2x    | UN | [AY630582.1]             | Grosser Binnense, DEU      |
| EPX2-DE-1 | European <i>D. pulex</i>       | 2x    | UN | [AY630583.1]             | Grebin, DEU                |
| EPX2-DE-2 | European <i>D. pulex</i>       | 2x    | UN | [AY630584.1]             | Malente, DEU               |
| PC2-SK-5  | <i>D. pulicaria</i>            | 2x    | FF | [AY630577.1, AY630578.1] | Humbolt Lake, SK, CAN      |
| PX2-IL-5  | North-American <i>D. pulex</i> | 2x    | SS | [AY630581.1]             | Vermillion County, IL, USA |
| PX2-IN-6  | North-American <i>D. pulex</i> | 2x    | SS |                          | Warren County, IN, USA     |
| PX2-ON-7  | North-American <i>D. pulex</i> | 2x    | SS | [AY630579.1]             | Essex County, ON, CAN      |
| PX2-QC-13 | North-American <i>D. pulex</i> | 2x    | SS | [AY630580.1]             | La Tuque, QC, CAN          |
| AR2-OR-1  | North-American <i>D. pulex</i> | 2x    | UN | [AY630585.1]             | Florence, OR, USA          |

---
