# Supplementary material for: Evolution of a transposon in Daphnia hybrid genomes
Source: PubMed Central journal article supplement (PMC3575242; doi:10.1186/1759-8753-4-7), 2013-02-06
Supplement: 1759-8753-4-7-S2.pdf [file 1759-8753-4-7-S2.pdf]

**Additional File 2. Amino acid polymorphism in 40 unique partial *Pokey* transposase sequences.**

The sequences were derived from 53 *Pokey* elements obtained from members of the *Daphnia pulex* complex. Numbers at each position represent the number of sequences that carry this amino acid. Not all values sum to 40 as indels occurred in some sequences. The pink bar represents the amino sequence coded by the partial exon 1. The blue bar represents the amino sequence coded by exon 2. The dark blue regions with greek numbers represent estimated regions of recombination identified using maximum chi-square analysis (Additional File 3).

| 5                                                                                                                                                                                                                                                                                                                                                                                                                                                                                                                                                                                                                                                               | 10                                            | 15                                            | 20                                                                                                            | 25                                                                                                                         | 30                            | 35                                                                             | 40              |
|-----------------------------------------------------------------------------------------------------------------------------------------------------------------------------------------------------------------------------------------------------------------------------------------------------------------------------------------------------------------------------------------------------------------------------------------------------------------------------------------------------------------------------------------------------------------------------------------------------------------------------------------------------------------|-----------------------------------------------|-----------------------------------------------|---------------------------------------------------------------------------------------------------------------|----------------------------------------------------------------------------------------------------------------------------|-------------------------------|--------------------------------------------------------------------------------|-----------------|
| A <sub>40</sub> F <sub>39</sub> R <sub>40</sub> V <sub>40</sub> A <sub>40</sub> S <sub>40</sub> N <sub>40</sub> Y <sub>40</sub> H <sub>40</sub> G <sub>40</sub> S <sub>40</sub> D <sub>26</sub> I <sub>35</sub> V <sub>40</sub> K <sub>40</sub> V <sub>40</sub> R <sub>40</sub> R <sub>40</sub> K <sub>39</sub> Q <sub>40</sub> R <sub>40</sub> D <sub>40</sub> G <sub>40</sub> S <sub>40</sub> F <sub>40</sub> R <sub>35</sub> S <sub>35</sub> K <sub>40</sub> S <sub>40</sub> C <sub>40</sub> P <sub>40</sub> K <sub>40</sub> A <sub>40</sub> I <sub>40</sub> D <sub>40</sub> D <sub>40</sub> Y <sub>38</sub> V <sub>40</sub> N <sub>40</sub> N <sub>40</sub> |                                               |                                               |                                                                                                               |                                                                                                                            |                               |                                                                                |                 |
| V <sub>1</sub>                                                                                                                                                                                                                                                                                                                                                                                                                                                                                                                                                                                                                                                  |                                               | N <sub>4</sub> L <sub>4</sub>                 | R <sub>1</sub>                                                                                                |                                                                                                                            | K <sub>4</sub> T <sub>4</sub> |                                                                                |                 |
| 45                                                                                                                                                                                                                                                                                                                                                                                                                                                                                                                                                                                                                                                              | 50                                            | 55                                            | 60                                                                                                            | 65                                                                                                                         | 70                            | 75                                                                             | 80              |
| M <sub>40</sub> G <sub>40</sub> G <sub>39</sub> V <sub>40</sub> D <sub>40</sub> T <sub>40</sub> A <sub>40</sub> N <sub>40</sub> Q <sub>39</sub> L <sub>40</sub> R <sub>40</sub> S <sub>40</sub> Y <sub>40</sub> Y <sub>40</sub> E <sub>40</sub> R <sub>40</sub> D <sub>40</sub> R <sub>40</sub> K <sub>40</sub> A <sub>40</sub> K <sub>40</sub> K <sub>40</sub> W <sub>40</sub> W <sub>40</sub> H <sub>39</sub> R <sub>40</sub> L <sub>40</sub> L <sub>40</sub> Y <sub>40</sub> S <sub>40</sub> L <sub>40</sub> L <sub>40</sub> E <sub>40</sub> T <sub>40</sub> C <sub>40</sub> L <sub>40</sub> V <sub>40</sub> N <sub>40</sub> S <sub>40</sub> W <sub>40</sub> |                                               |                                               |                                                                                                               |                                                                                                                            |                               |                                                                                |                 |
|                                                                                                                                                                                                                                                                                                                                                                                                                                                                                                                                                                                                                                                                 | R <sub>1</sub>                                |                                               |                                                                                                               | Q <sub>1</sub>                                                                                                             |                               |                                                                                |                 |
| 85                                                                                                                                                                                                                                                                                                                                                                                                                                                                                                                                                                                                                                                              | 90                                            | 95                                            | 100                                                                                                           | 105                                                                                                                        | 110                           | 115                                                                            | 120             |
| I <sub>40</sub> C <sub>40</sub> F <sub>40</sub> N <sub>40</sub> D <sub>40</sub> M <sub>37</sub> V <sub>40</sub> E <sub>40</sub> E <sub>40</sub> N <sub>40</sub> Y <sub>39</sub> L <sub>40</sub> E <sub>23</sub> D <sub>17</sub> F <sub>21</sub> E <sub>40</sub> V <sub>31</sub> P <sub>21</sub> M <sub>40</sub> T <sub>21</sub> F <sub>23</sub> L <sub>40</sub> E <sub>40</sub> F <sub>40</sub> K <sub>40</sub> R <sub>40</sub> N <sub>40</sub> V <sub>39</sub> T <sub>40</sub> M <sub>40</sub> G <sub>40</sub> L <sub>40</sub> L <sub>39</sub> S <sub>40</sub> H <sub>34</sub> A <sub>23</sub> L <sub>40</sub> N <sub>40</sub> E <sub>40</sub> N <sub>23</sub> |                                               |                                               |                                                                                                               |                                                                                                                            |                               |                                                                                |                 |
|                                                                                                                                                                                                                                                                                                                                                                                                                                                                                                                                                                                                                                                                 | I <sub>3</sub>                                | C <sub>1</sub>                                | A <sub>14</sub> A <sub>8</sub> Y <sub>19</sub> L <sub>4</sub> Q <sub>18</sub> P <sub>19</sub> L <sub>17</sub> |                                                                                                                            | A <sub>1</sub>                | Y <sub>4</sub> S <sub>17</sub>                                                 | K <sub>17</sub> |
|                                                                                                                                                                                                                                                                                                                                                                                                                                                                                                                                                                                                                                                                 |                                               | V <sub>3</sub> S <sub>8</sub>                 | A <sub>3</sub>                                                                                                |                                                                                                                            |                               | Q <sub>2</sub>                                                                 |                 |
|                                                                                                                                                                                                                                                                                                                                                                                                                                                                                                                                                                                                                                                                 |                                               | N <sub>7</sub>                                | D <sub>2</sub>                                                                                                |                                                                                                                            |                               |                                                                                |                 |
| 125                                                                                                                                                                                                                                                                                                                                                                                                                                                                                                                                                                                                                                                             | 130                                           | 135                                           | 140                                                                                                           | 145                                                                                                                        | 150                           | 155                                                                            | 160             |
| K <sub>40</sub> T <sub>19</sub> Q <sub>21</sub> A <sub>40</sub> G <sub>40</sub> R <sub>40</sub> A <sub>40</sub> G <sub>40</sub> R <sub>40</sub> M <sub>40</sub> M <sub>25</sub> P <sub>38</sub> T <sub>34</sub> I <sub>40</sub> H <sub>40</sub> P <sub>40</sub> S <sub>40</sub> A <sub>40</sub> E <sub>39</sub> P <sub>40</sub> G <sub>40</sub> A <sub>40</sub> K <sub>40</sub> R <sub>40</sub> R <sub>39</sub> K <sub>40</sub> S <sub>38</sub> R <sub>39</sub> L <sub>40</sub> S <sub>40</sub> V <sub>40</sub> R <sub>40</sub> D <sub>40</sub> D <sub>25</sub> I <sub>21</sub> R <sub>40</sub> F <sub>25</sub> T <sub>24</sub> G <sub>20</sub> V <sub>40</sub> |                                               |                                               |                                                                                                               |                                                                                                                            |                               |                                                                                |                 |
| E <sub>10</sub> K <sub>19</sub>                                                                                                                                                                                                                                                                                                                                                                                                                                                                                                                                                                                                                                 |                                               | K <sub>15</sub> R <sub>2</sub> S <sub>6</sub> | G <sub>1</sub>                                                                                                |                                                                                                                            | R <sub>2</sub>                | Q <sub>8</sub> F <sub>17</sub> L <sub>15</sub> S <sub>16</sub> C <sub>19</sub> |                 |
| V <sub>7</sub>                                                                                                                                                                                                                                                                                                                                                                                                                                                                                                                                                                                                                                                  |                                               |                                               |                                                                                                               |                                                                                                                            |                               | E <sub>7</sub>                                                                 |                 |
| N <sub>4</sub>                                                                                                                                                                                                                                                                                                                                                                                                                                                                                                                                                                                                                                                  |                                               |                                               |                                                                                                               |                                                                                                                            |                               |                                                                                |                 |
| I                                                                                                                                                                                                                                                                                                                                                                                                                                                                                                                                                                                                                                                               |                                               |                                               |                                                                                                               |                                                                                                                            |                               |                                                                                |                 |
| 165                                                                                                                                                                                                                                                                                                                                                                                                                                                                                                                                                                                                                                                             | 170                                           | 175                                           | 180                                                                                                           | 185                                                                                                                        | 190                           | 195                                                                            | 200             |
| G <sub>40</sub> N <sub>19</sub> H <sub>40</sub> L <sub>40</sub> P <sub>40</sub> I <sub>39</sub> F <sub>40</sub> G <sub>40</sub> E <sub>40</sub> A <sub>40</sub> R <sub>40</sub> G <sub>40</sub> R <sub>40</sub> C <sub>40</sub> E <sub>40</sub> W <sub>40</sub> C <sub>37</sub> Q <sub>40</sub> A <sub>37</sub> T <sub>39</sub> T <sub>33</sub> P <sub>19</sub> K <sub>28</sub> K <sub>40</sub> L <sub>40</sub> E <sub>40</sub> S <sub>40</sub> R <sub>40</sub> P <sub>40</sub> F <sub>40</sub> S <sub>40</sub> K <sub>39</sub> C <sub>40</sub> K <sub>40</sub> Q <sub>40</sub> C <sub>40</sub> N <sub>40</sub> V <sub>40</sub> F <sub>40</sub> L <sub>37</sub> |                                               |                                               |                                                                                                               |                                                                                                                            |                               |                                                                                |                 |
| I <sub>15</sub>                                                                                                                                                                                                                                                                                                                                                                                                                                                                                                                                                                                                                                                 | F <sub>1</sub>                                |                                               | S <sub>2</sub>                                                                                                | V <sub>3</sub> A <sub>1</sub> K <sub>7</sub> G <sub>14</sub> N <sub>7</sub>                                                |                               |                                                                                | V <sub>3</sub>  |
| L <sub>6</sub>                                                                                                                                                                                                                                                                                                                                                                                                                                                                                                                                                                                                                                                  |                                               |                                               | Y <sub>1</sub>                                                                                                | K <sub>5</sub> T <sub>5</sub>                                                                                              |                               |                                                                                |                 |
|                                                                                                                                                                                                                                                                                                                                                                                                                                                                                                                                                                                                                                                                 |                                               |                                               |                                                                                                               | H <sub>2</sub>                                                                                                             |                               |                                                                                |                 |
| II                                                                                                                                                                                                                                                                                                                                                                                                                                                                                                                                                                                                                                                              |                                               |                                               |                                                                                                               |                                                                                                                            |                               |                                                                                |                 |
| 205                                                                                                                                                                                                                                                                                                                                                                                                                                                                                                                                                                                                                                                             | 210                                           | 215                                           | 220                                                                                                           | 225                                                                                                                        | 230                           | 235                                                                            | 240             |
| C <sub>40</sub> L <sub>40</sub> G <sub>40</sub> K <sub>40</sub> K <sub>40</sub> R <sub>40</sub> N <sub>40</sub> C <sub>40</sub> F <sub>40</sub> V <sub>40</sub> E <sub>40</sub> Y <sub>23</sub> H <sub>40</sub> D <sub>40</sub> E <sub>26</sub> N <sub>40</sub> Y <sub>38</sub> F <sub>16</sub> Q <sub>16</sub> S <sub>19</sub> E <sub>40</sub> E <sub>32</sub> E <sub>5</sub> A <sub>5</sub> P <sub>40</sub> L <sub>40</sub> E <sub>20</sub> E <sub>19</sub> V <sub>40</sub> E <sub>40</sub> A <sub>40</sub> V <sub>39</sub> Y <sub>40</sub> S <sub>40</sub> A <sub>40</sub> S <sub>39</sub> E <sub>40</sub> E <sub>40</sub> S <sub>40</sub> D <sub>40</sub>   |                                               |                                               |                                                                                                               |                                                                                                                            |                               |                                                                                |                 |
|                                                                                                                                                                                                                                                                                                                                                                                                                                                                                                                                                                                                                                                                 |                                               | F <sub>17</sub>                               | D <sub>14</sub> C <sub>1</sub>                                                                                | V <sub>15</sub> D <sub>7</sub>                                                                                             |                               | D <sub>13</sub> D <sub>17</sub>                                                |                 |
|                                                                                                                                                                                                                                                                                                                                                                                                                                                                                                                                                                                                                                                                 |                                               |                                               |                                                                                                               | F <sub>5</sub> G <sub>1</sub>                                                                                              |                               | A <sub>6</sub> G <sub>3</sub>                                                  |                 |
| III and IV                                                                                                                                                                                                                                                                                                                                                                                                                                                                                                                                                                                                                                                      |                                               |                                               |                                                                                                               |                                                                                                                            |                               |                                                                                |                 |
| 245                                                                                                                                                                                                                                                                                                                                                                                                                                                                                                                                                                                                                                                             | 250                                           | 255                                           | 260                                                                                                           | 265                                                                                                                        | 270                           | 275                                                                            | 280             |
| G <sub>40</sub> Q <sub>40</sub> A <sub>23</sub> S <sub>40</sub> D <sub>40</sub> H <sub>40</sub> E <sub>40</sub> P <sub>40</sub> T <sub>40</sub> N <sub>40</sub> K <sub>23</sub> E <sub>40</sub> C <sub>37</sub> S <sub>40</sub> S <sub>40</sub> S <sub>39</sub> S <sub>40</sub> A <sub>40</sub> D <sub>40</sub> S <sub>39</sub> D <sub>31</sub> E <sub>31</sub> L <sub>36</sub> E <sub>39</sub> D <sub>28</sub> T <sub>16</sub> D <sub>21</sub> R <sub>4</sub> R <sub>4</sub> E <sub>4</sub> G <sub>4</sub> Y <sub>4</sub> M <sub>4</sub> I <sub>4</sub> D <sub>4</sub> D <sub>4</sub> Y <sub>4</sub> D <sub>4</sub> D <sub>4</sub> F <sub>4</sub>              |                                               |                                               |                                                                                                               |                                                                                                                            |                               |                                                                                |                 |
| V <sub>17</sub>                                                                                                                                                                                                                                                                                                                                                                                                                                                                                                                                                                                                                                                 |                                               | A <sub>15</sub> F <sub>3</sub>                | T <sub>1</sub>                                                                                                | P <sub>1</sub> Y <sub>9</sub> G <sub>9</sub> P <sub>4</sub> D <sub>1</sub> Y <sub>11</sub> S <sub>12</sub> N <sub>19</sub> |                               |                                                                                |                 |
|                                                                                                                                                                                                                                                                                                                                                                                                                                                                                                                                                                                                                                                                 | E <sub>2</sub>                                |                                               |                                                                                                               | H <sub>1</sub> P <sub>10</sub>                                                                                             |                               |                                                                                |                 |
|                                                                                                                                                                                                                                                                                                                                                                                                                                                                                                                                                                                                                                                                 |                                               |                                               |                                                                                                               | I <sub>1</sub>                                                                                                             |                               |                                                                                |                 |
| V                                                                                                                                                                                                                                                                                                                                                                                                                                                                                                                                                                                                                                                               |                                               |                                               |                                                                                                               |                                                                                                                            |                               |                                                                                |                 |
| VI                                                                                                                                                                                                                                                                                                                                                                                                                                                                                                                                                                                                                                                              |                                               |                                               |                                                                                                               |                                                                                                                            |                               |                                                                                |                 |
| 285                                                                                                                                                                                                                                                                                                                                                                                                                                                                                                                                                                                                                                                             | 290                                           | 295                                           |                                                                                                               |                                                                                                                            |                               |                                                                                |                 |
| Q <sub>4</sub> D <sub>4</sub> R <sub>40</sub> D <sub>32</sub> G <sub>40</sub> F <sub>21</sub> V <sub>25</sub> I <sub>39</sub> D <sub>40</sub> E <sub>31</sub> Y <sub>40</sub> D <sub>30</sub> E <sub>25</sub> F <sub>40</sub> Q <sub>34</sub> Q <sub>23</sub>                                                                                                                                                                                                                                                                                                                                                                                                   |                                               |                                               |                                                                                                               |                                                                                                                            |                               |                                                                                |                 |
| E <sub>8</sub>                                                                                                                                                                                                                                                                                                                                                                                                                                                                                                                                                                                                                                                  | Y <sub>19</sub> M <sub>8</sub> F <sub>1</sub> | D <sub>9</sub>                                | N <sub>10</sub> D <sub>15</sub>                                                                               | L <sub>6</sub> E <sub>17</sub>                                                                                             |                               |                                                                                |                 |
