# Supplementary material for: Evolution of a transposon in Daphnia hybrid genomes
Source: PubMed Central journal article supplement (PMC3575242; doi:10.1186/1759-8753-4-7), 2013-02-06
Supplement: 1759-8753-4-7-S3.pdf [file 1759-8753-4-7-S3.pdf]

| Event assigned | Grouped event | Effective sites | Group pair      | Half-window sizes for which event has been detected (expected sites)                                    |
|----------------|---------------|-----------------|-----------------|---------------------------------------------------------------------------------------------------------|
| A              | I             | 592-607         | c : a           | 70 (547-717)<br>80 (547-549, 557, 608, 614-711)<br>90 (556-737)<br>100 (663-707, 730, 737-756, 801-804) |
| B              |               | 592-607         | a : PX2-QC-8_29 | 70 (488-511)<br>80 (547, 555-556, 567-602, 610)                                                         |
| C              |               | 592-607         | TE3-MB-4_9 : i  | 70 (532-534)                                                                                            |
| D              |               | 592-607         | h : a           | 70 (516-531)                                                                                            |
| E              |               | 592-607         | a : g           | 80 (531-545)                                                                                            |
| F              | II            | 748-800         | i : b           | 70 (722-768)<br>80 (717-795)<br>90 (738-853)                                                            |
| G              |               | 748-800         | i : EPC2-SP-2_1 | 90 (759-779)                                                                                            |
| H              | III           | 815-856         | i : PX3-QC-1_20 | 70 (779-795)<br>100 (816-864)                                                                           |
| I              | IV            | 825-856         | i : c           | 70 (800-873)<br>80 (800-933)<br>90 (871-956)<br>100 (974-979)                                           |
| J              |               | 825-856         | a : b           | 90 (857-868)                                                                                            |
| K              |               | 825-856         | a : EPC2-SP-2_1 | 90 (857-868)                                                                                            |
| L              |               | 825-856         | h : EPC2-SP-2_1 | 100 (957)                                                                                               |
| M              | V             | 917-920         | h : c           | 70 (874-927)<br>90 (957-970)                                                                            |
| N              |               | 917-920         | h : a           | 70 (929-931)<br>100 (957-970)                                                                           |
| O              | VI            | 952-957         | c : g           | 80 (934-946)<br>90 (974)                                                                                |
| P              | VII           | 1038-1073       | a : g           | 70 (933-1002, 1008)<br>80 (951-1002)<br>90 (979-982)                                                    |
| Q              |               | 1038-1073       | TE3-MB-4_9 : g  | 70 (1003, 1009-1013)                                                                                    |

|   |           |                          |                      |
|---|-----------|--------------------------|----------------------|
|   |           |                          | 80 (1003-1013)       |
|   |           |                          | 90 (987-1023)        |
| R | 1038-1073 | TE3-MB-1_9 : PX2-MB-8_1  | 70 (1097-1118, 1165) |
| S | 1038-1073 | TE3-MB-1_9 : PX2-MB-8_29 | 70 (1020-1118, 1165) |
|   |           |                          | 80 (1020-1080)       |
| T | 1038-1073 | TE3-MB-1_9 : f           | 70 (1158-1160)       |

---
