# Supplementary material for: Evolution of a transposon in Daphnia hybrid genomes
Source: PubMed Central journal article supplement (PMC3575242; doi:10.1186/1759-8753-4-7), 2013-02-06
Supplement: 1759-8753-4-7-S4.pdf [file 1759-8753-4-7-S4.pdf]

| <b>Group</b> | <b>Sequences</b> | <b>Genbank number</b> |
|--------------|------------------|-----------------------|
| <b>a</b>     | TE3-MB-4_6       | JX838814              |
|              | TE3-MB-4_12      | JX838816              |
|              | TE3-MB-4_13      | JX838817              |
|              | TE3-MB-1_17      | JX838818              |
|              | TE3-MB-4_9       | JX838815              |
| <b>b</b>     | PC3-QC-3_5       | JX838846              |
|              | PX2-QC-8_3       | JX838841              |
|              | TE2-MB-3_3       | JX838837              |
|              | TE2-MB-3_20      | JX838838              |
|              | TE3-MB-1_14      | JX838821              |
|              | TE3-MB-2_13      | JX838825              |
|              | EPC2-DE-3_1      | AY630582.1            |
| EPC2-SP-2_1  | JX838835         |                       |
| <b>c</b>     | PC3-MB-5_15      | JX838811              |
|              | PC3-MB-5_17      | JX838812              |
|              | MI3-MB-2_1       | JX838813              |
| <b>d</b>     | TE2-MB-1_18      | JX838833              |
|              | TE3-MB-1_2       | JX838820              |
|              | TE3-MB-1_3       | JX838819              |
|              | TE3-MB-1_19      | JX838822              |
|              | TE3-MB-3_1       | JX838829              |
|              | TE3-MB-3_4       | JX838830              |
|              | TE3-MB-3_25      | JX838831              |
|              | TE3-MB-2_10      | JX838824              |
|              | TE3-MB-2_14      | JX838823              |
|              | TE3-MB-2_19      | JX838826              |
|              | TE3-MB-2_21      | JX838827              |
| <b>e</b>     | EPX2-DE-1        | AY630583.1            |
|              | EPX2-DE-2        | AY630584.1            |
| <b>f</b>     | PC2-SK-5_1       | AY630577.1            |
|              | EPC2-CZ-1_1      | JX838834              |
|              | TE2-MB-1_8       | JX838832              |
|              | PC3-QC-3_17      | JX838847              |
|              | PX2-QC-8_1       | JX838839              |
| PX2-QC-8_29  | JX838843         |                       |
| <b>g</b>     | PC2-QC-4_1       | JX838808              |
|              | PC2-QC-4_2       | JX838809              |
|              | PC2-SK-5_1       | AY630578.1            |
|              | PC3-QC-1_28      | JX838851              |
|              | PX2-QC-8_2       | JX838840              |
|              | PX2-QC-8_4       | JX838845              |
|              | PX2-QC-8_28      | JX838842              |
|              | PX3-QC-1_1       | JX838848              |
|              | PX3-QC-1_9       | JX838849              |
|              | TE2-MB-2_6       | JX838836              |
| PX3-QC-1_20  | JX838850         |                       |
| <b>h</b>     | PX2-MB-1_18      | JX838828              |
|              | PX2-US-CON       | AY630581.1            |

---

|          |             |            |
|----------|-------------|------------|
| <b>h</b> | PX2-MB-1_18 | JX838828   |
|          | PX2-US-C0N  | AY630581.1 |
|          | PX2-ON-7_1  | AY630579.1 |
|          | PX2-QC-13_1 | AY630580.1 |

---

|          |            |            |
|----------|------------|------------|
| <b>i</b> | AR2-OR-1_1 | AY630585.1 |
|----------|------------|------------|

---
