# Supplementary material for: Evolution of a transposon in Daphnia hybrid genomes
Source: PubMed Central journal article supplement (PMC3575242; doi:10.1186/1759-8753-4-7), 2013-02-06

**Additional File 6. Phylogenetic network of 58 partial *Pokey* sequences.**

The network was constructed using the NeighborNet algorithm. Sequences named CO\_Scaffold\_xxx were obtained from the v1.1 genome sequence of *Daphnia pulex* [36]. Colors represent species or hybrid state of isolates: red = *D. pulex*, light blue = *D. arenata*, grey = *D. tenebrosa*, black = European *D. pulex*, dark blue = European *D. pulicaria*, green = *D. pulicaria*, orange = putative *pulex-pulicaria* hybrids, purple = the isolate with *D. tenebrosa* mtDNA and a *D. pulex* nuclear genome.

0.01

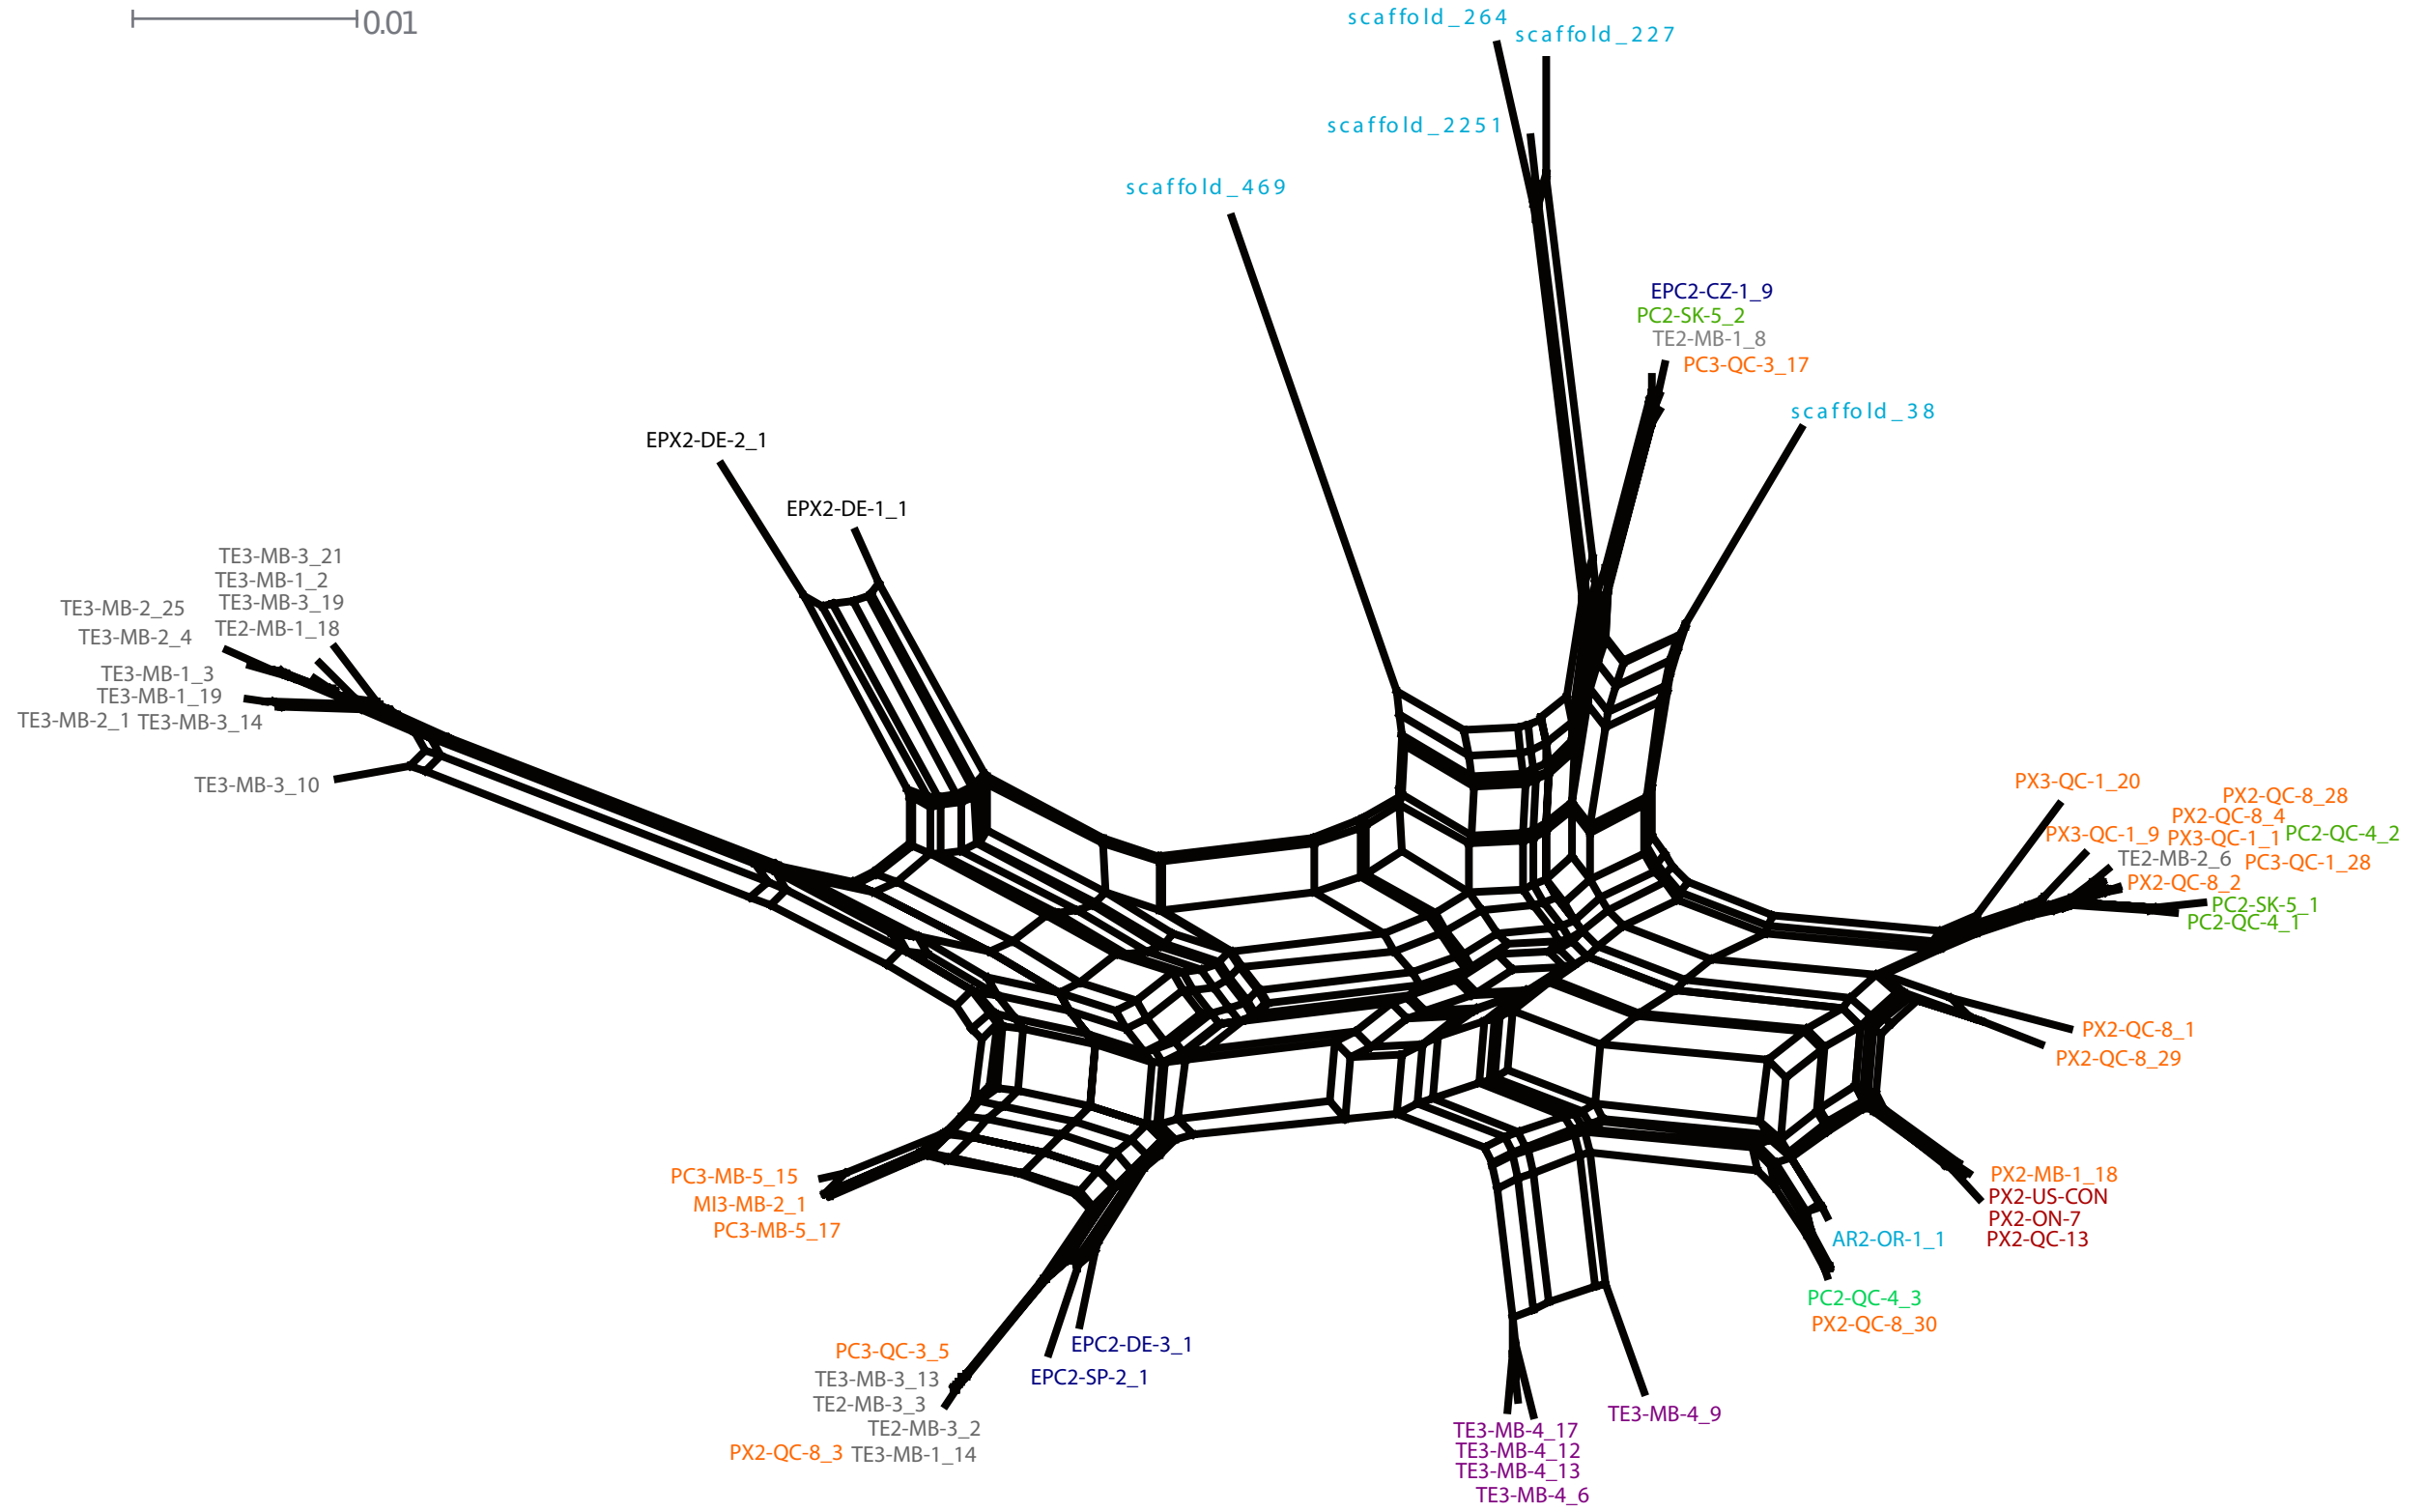

Supplement: 1759-8753-4-7-S6.pdf [file 1759-8753-4-7-S6.pdf]
