# Supplementary material for: Evolution of a transposon in Daphnia hybrid genomes
Source: PubMed Central journal article supplement (PMC3575242; doi:10.1186/1759-8753-4-7), 2013-02-06
Supplement: 1759-8753-4-7-S7.pdf [file 1759-8753-4-7-S7.pdf]

**Additional File 7. Pokey RFLP haplotypes amplified from 41 isolates of the *Daphnia pulex* complex.**

Location codes are defined in Table 2. A one letter code allows differentiation of geographical regions in the same state or province: C = Churchill, MB, CAN; W = Winnipeg, MB, CAN; K = Kuujjuarapik, QC, CAN; M = Metis, QC, CAN; S = Sainte-Foy, QC, CAN. Taxonomic codes are as follows: EPC = European *D. pulicaria*; PC = *D. pulicaria*; PX = *D. pulex*; TE = *D. tenebrosa*; Hyb = pulex-pulicaria hybrid; Int = introgressed isolate.

| Isolates  | Locality   | Taxonomy | Ecological niche | RFLP haplotypes |   |   |   |   |   |   |   |  |   |
|-----------|------------|----------|------------------|-----------------|---|---|---|---|---|---|---|--|---|
|           |            |          |                  | 1               | 2 | 3 | 4 | 5 | 6 | 7 | 8 |  |   |
| PX2-IL-1  | IL, USA    | PC       | Lake             |                 | x |   |   |   |   |   |   |  | x |
| PX2-IL-2  | IL, USA    | PC       | Lake             |                 | x |   |   |   |   |   |   |  | x |
| PX2-IL-3  | IL, USA    | PC       | Lake             |                 | x |   |   |   |   |   |   |  | x |
| PX2-IL-4  | IL, USA    | PC       | Lake             |                 | x |   |   |   |   |   |   |  |   |
| PC2-IN-1  | IN, USA    | PC       | Lake             |                 | x |   |   |   |   |   |   |  |   |
| PC2-IN-2  | IN, USA    | PC       | Lake             |                 | x |   |   |   |   |   |   |  |   |
| PC2-MB-3  | W, MB, CAN | PC       | Lake             |                 |   |   |   |   |   |   |   |  | x |
| EPC2-CZ-1 | CZR        | EPC      | Lake             |                 |   | x |   |   |   |   |   |  |   |
| EPC2-SP-2 | ESP        | EPC      | Lake             |                 |   |   | x |   |   |   |   |  |   |
| PX2-ON-3  | ON, CAN    | PX       | Pond             | x               |   |   |   |   |   |   |   |  |   |
| PX2-ON-2  | ON, CAN    | Hyb      | Pond             | x               |   |   |   |   |   |   |   |  | x |
| PX2-ON-10 | ON, CAN    | Hyb      | Pond             | x               | x |   |   |   |   |   |   |  |   |
| PX2-ON-4  | ON, CAN    | PX       | Pond             | x               |   |   |   |   |   |   |   |  |   |
| PX2-QC-5  | S, QC, CAN | Hyb      | Pond             | x               | x |   |   |   |   |   |   |  |   |
| PX2-QC-6  | S, QC, CAN | Hyb      | Pond             | x               | x |   |   |   |   |   |   |  |   |
| PX2-MI-7  | MI, USA    | Hyb      | Pond             | x               |   | x | x |   |   |   | x |  | x |
| PX2-QC-9  | M, QC, CAN | Hyb      | Pond             |                 |   |   |   |   |   | x |   |  |   |
| PX2-QC-12 | M, QC, CAN | Hyb      | Pond             | x               |   |   |   |   |   |   |   |  |   |
| TE3-MB-1  | C, MB, CAN | TE       | Toundra Pond     |                 |   | x | x |   |   |   |   |  |   |
| TE3-MB-2  | C, MB, CAN | TE       | Toundra Pond     |                 |   | x | x |   |   |   |   |  |   |
| TE3-MB-3  | C, MB, CAN | TE       | Toundra Pond     |                 |   | x |   |   |   |   |   |  |   |
| TE2-MB-1  | C, MB, CAN | TE       | Toundra Pond     |                 |   | x |   |   |   |   |   |  | x |
| TE2-MB-2  | C, MB, CAN | TE       | Toundra Pond     |                 | x |   |   |   |   |   |   |  |   |
| TE2-MB-3  | C, MB, CAN | TE       | Toundra Pond     |                 |   |   | x |   |   |   |   |  |   |

|          |             |     |              |   |   |   |   |  |   |
|----------|-------------|-----|--------------|---|---|---|---|--|---|
| PC3-QC-1 | K, QC, CAN  | Hyb | Toundra pond | x |   |   |   |  |   |
| PC3-QC-2 | K, QC, CANj | Hyb | Toundra pond | x | x |   |   |  | x |
| PC3-QC-7 | K, QC, CAN  | Hyb | Toundra pond |   |   |   | x |  | x |
| TE3-MB-4 | C, MB, CAN  | Int | Rock bluff   | x |   |   | x |  |   |
| PC3-MB-4 | C, MB, CAN  | Hyb | Rock bluff   |   |   |   | x |  |   |
| PC3-MB-5 | C, MB, CAN  | Hyb | Rock bluff   |   |   |   | x |  |   |
| PC3-MB-6 | C, MB, CAN  | Hyb | Rock bluff   |   |   | x |   |  |   |
| PX2-MB-3 | C, MB, CAN  | Hyb | Rock bluff   | x |   |   |   |  |   |
| MI3-MB-1 | C, MB, CAN  | Hyb | Rock bluff   | x |   |   | x |  | x |
| PX2-MB-1 | C, MB, CAN  | PX  | Rock bluff   |   |   |   | x |  |   |
| MI3-SF-2 | C, MB, CAN  | Hyb | Rock bluff   |   |   |   | x |  | x |
| PX2-MB-2 | C, MB, CAN  | PX  | Rock bluff   |   |   | x | x |  |   |
| PX2-QC-8 | K, QC, CAN  | Hyb | Rock bluff   | x | x | x | x |  | x |
| PC3-QC-3 | K, QC, CAN  | Hyb | Rock bluff   |   |   | x | x |  |   |
| PX3-QC-1 | K, QC, CAN  | Hyb | Rock bluff   | x | x |   |   |  | x |
| PX3-QC-2 | K, QC, CAN  | Hyb | Rock bluff   | x |   |   |   |  |   |
| PC2-QC-4 | K, QC, CAN  | PC  | Rock bluff   | x | x |   |   |  |   |

---
